# Supplementary material for: Protective Effects of Chicken Bone Marrow-Derived Mesenchymal Stem Cells on a Mouse Model of Acute Lung Injury
Source: Research Square preprint supplement (doi:10.21203/rs.3.rs-440197/v1), 2021-04-23
Supplement: Supplementary file 1 [file 43596fbf6925b8f9e21358f3.docx]

**Supplementary material 1.** Composition of the medium used to culture chicken BM-MSCs.

| Complete medium | DMEM/F12, 10% FBS, 5 ng/mLbFGF, 2 mM L-glutamine |
| --- | --- |
| Adipocyte induction medium | DMEM/F12, 10% FBS, 1 mM dexamethasone, 0.5 mM IBMX, 10 mg/mLinsulin and 60 mM indomethacin |
| Osteogenic induction medium | DMEM/F12, 10% FBS, 0.5 mM dexamethasone, 10 mM β-glycerophosphate and 50 mg/mLvitamin C |
| Chondrogenic induction medium | DMEM/F12, 10% FBS, 1% ITS, 50 mg/mLL-proline, 0.1 mM dexamethasone, 0.9 mM sodium pyruvate, 50 mg/mLvitamin C and 10 ng/mLTGF-β3 |
| Neurogenic inducting medium | DMEM/F12, 2% B27, 1% glutamine, 40 ng/mLmedium-1 bFGF, 20 ng/mL EGF, 1 μM all-trans-retinoic acid, and 100 μM 2-mercapoethanol |
