# Supplementary material for: Protective Effects of Chicken Bone Marrow-Derived Mesenchymal Stem Cells on a Mouse Model of Acute Lung Injury
Source: Research Square preprint supplement (doi:10.21203/rs.3.rs-440197/v1), 2021-04-23
Supplement: Supplementary file 1 [file cc0bd8b743cfa9062452630d.docx]

**Supplementary material 4.** The results of Evans blue leakage test.


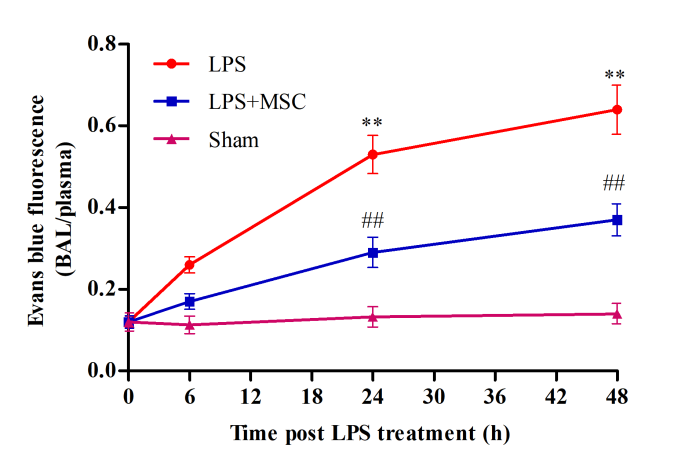


LPS injection increased the Evans blue content, while BM-MSCs administration attenuated Evans blue content. ** indicates that the difference in the data is very significant compared with the Sham group. ## indicates that the difference in the data is very significant compared with the LPS group. Values are expressed as the means ± SD.
