# Supplementary material for: Protective Effects of Chicken Bone Marrow-Derived Mesenchymal Stem Cells on a Mouse Model of Acute Lung Injury
Source: Research Square preprint supplement (doi:10.21203/rs.3.rs-440197/v1), 2021-04-23
Supplement: Supplementary file 5 [file c71e6416d730f3d816332d74.docx]

**Supplementary material 3.** The results of flow cytometry.


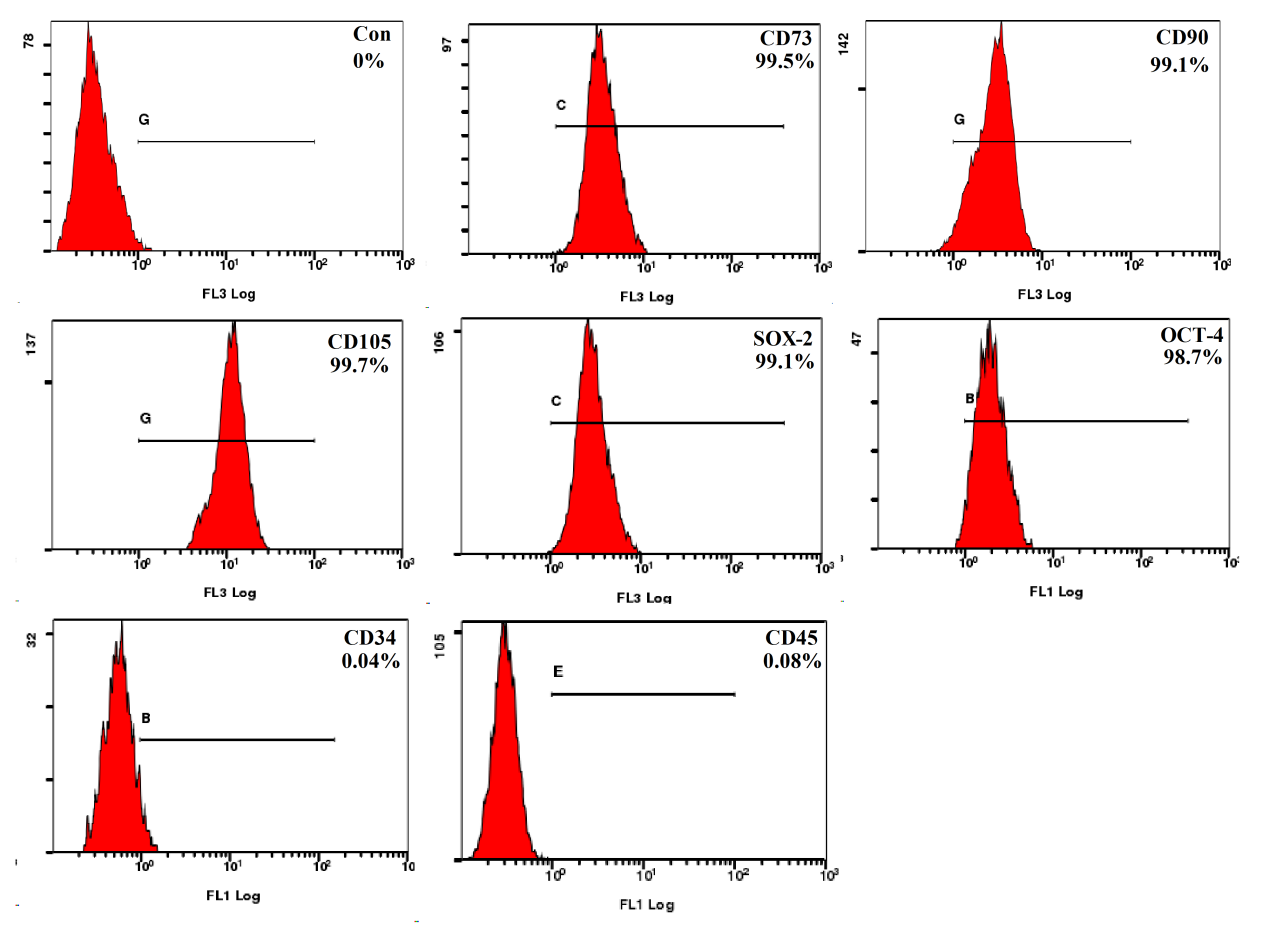


The BM-MSCs surface antigens CD73, CD90, CD105, Sox-2, and OCT-4 were positively expressed, while CD34 and CD45 were negatively expressed, as identified by flow cytometry.
