# Supplementary material for: Protective Effects of Chicken Bone Marrow-Derived Mesenchymal Stem Cells on a Mouse Model of Acute Lung Injury
Source: Research Square preprint supplement (doi:10.21203/rs.3.rs-440197/v1), 2021-04-23
Supplement: Supplementary file 7 [file d209e598ba49c43242f0ce9a.docx]

**Supplementary material 2.** The primer sequences used for BM-MSC identification.

| Gene name | Primer sequence |
| --- | --- |
| CXCL1 | F: 5’ AAGGATGGTCGCAATG 3’ |
|  | R: 5’ GGTGGCTAAGTCTGAGGT 3’ |
| IL-1β | F: 5’ CAGAACAGCCGGACTTTC 3’ |
|  | R: 5’ CTTGCTCGCCTTCACCAC 3’ |
| IL-6 | F: 5’ AGGGACCCAAAGGAGACAT 3’ |
|  | R: 5’ GCACGGAAATTCCTGTTGAT 3’ |
| IL-8 | F: 5’ GCCATCTGCTACACAGGTGA 3’ |
|  | R: 5’ AAAGGCTCCTCAGGTTCTGG 3’ |
| IL-10 | F: 5' ACCGCCTTGTCGTTAGACTG 3' |
|  | R: 5' GAATCTCCATCGTCCTCCAC-3' |
| IL-1RN | F: 5' GCTCATTGCTGGGTACTTACAA 3’ |
|  | R: 5' CCAGACTTGGCACAAGACAGG 3’ |
| TLR4 | F: 5' ATGGCATGGCTTACACCACC 3' |
|  | R: 5' GAGGCCAATTTTGTCTCCACA 3' |
| Myd88 | F: 5' TCATGTTCTCCATACCCTTGGT 3' |
|  | R: 5' AAACTGCGAGTGGGGTCAG 3' |
| MMP-9 | F: 5' CTGGACAGCCAGACACTAAAG 3' |
|  | R: 5' CTCGCGGCAAGTCTTCAGAG 3' |
| GAPDH | F: 5'-CACTGTCCACGCCATCACT 3' |
|  | R: 5'-CCTGTTGCTGTAGCCGAATT 3' |
